# Supplementary material for: Studies of spin related processes in fullerene C60 devices
Source: Royal Society of Chemistry journal article supplement (doi:10.1039/c7tc05086k), 2018-01-01
Supplement: c7tc05086k1.pdf [file c7tc05086k1.pdf]

## **Supplemental Information**

### **Studies of spin related processes in fullerene C<sub>60</sub> devices**

H. L. Liu, J. Y. Wang, M. Groesbeck, X. Pan, C. Zhang and Z. V. Vardeny\*

Department of Physics & Astronomy, University of Utah, Salt Lake City, Utah 84112, USA

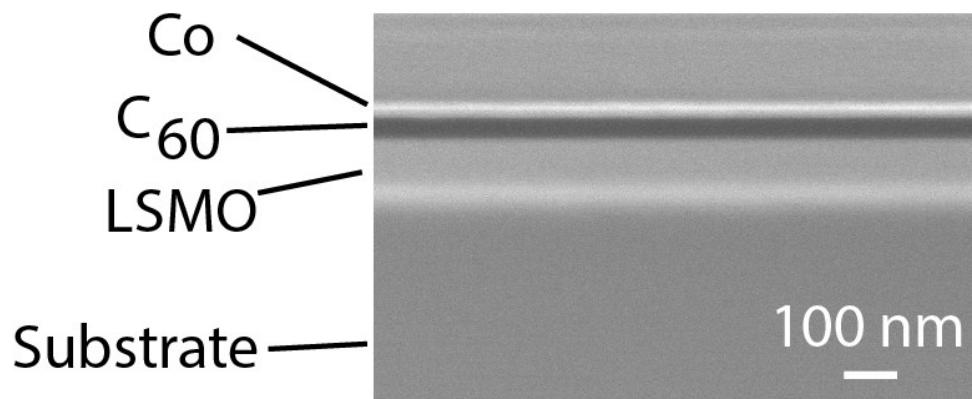

Fig. S1 Cross-section view SEM image of the C<sub>60</sub>-based spin valve device that shows the different layers, as denoted.

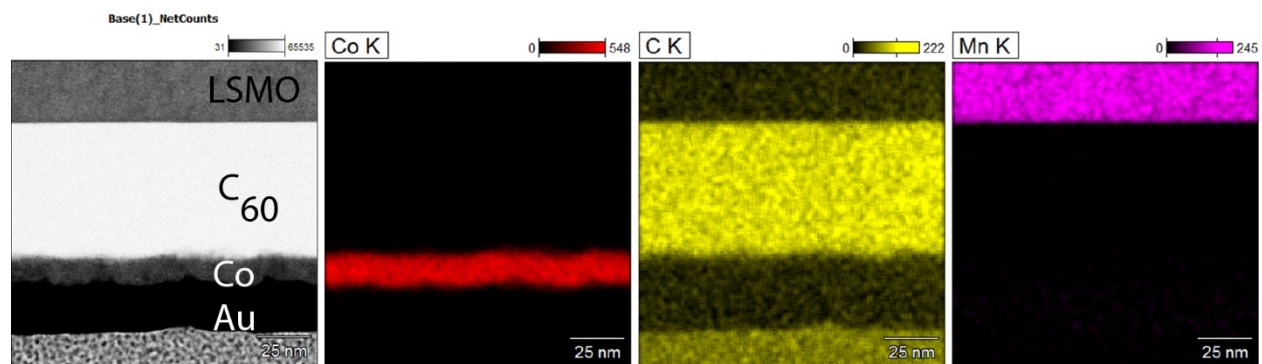

Fig. S2 False color of the energy dispersive spectroscopy for elemental analysis in C<sub>60</sub> based spin valve device, as denoted.
